# Supplementary material
Source: PubMed Central journal article supplement (PMC2666592)

**COMPREHENSIVE EGG-COAT PROTEOME OF AN ASCIDIAN *CIONA*  
*INTESTINALIS* REVEALS GAMATE RECOGNITION MOLECULES INVOLVED IN  
SELF-STERILITY**

**Lixy Yamada<sup>1\*</sup>, Takako Saito<sup>2\*</sup>, Hisaaki Taniguchi<sup>1,3</sup>, Hitoshi Sawada<sup>2\*\*</sup>, and Yoshito Harada<sup>2\*\*</sup>**

**Address correspondence to:** Hitoshi Sawada and Yoshito Harada (co-corresponding authors), Sugashima Marine Biological Laboratory, Graduate School of Science, Nagoya University, Sugashima, Toba 517-0004, Japan.  
Tel. 81-599-34-2216; Fax. 81-599-34-2456; E-mail: [hsawada@bio.nagoya-u.ac.jp](mailto:hsawada@bio.nagoya-u.ac.jp) (H.S.), [yharada@bio.nagoya-u.ac.jp](mailto:yharada@bio.nagoya-u.ac.jp) (Y.H.)

**SUPPLEMENTAL DATA**

**Fig. S1. Immunocytochemistry and Far Western Analysis of Ci-ApoBL**

(A) An immunoblot of the FT and VC samples detected with an anti-Ci-ApoBL antiserum. (B-E) Localization of Ci-ApoBL protein on the VC and egg cytoplasm. Left column (B, D), immunostained images; right column (C, E), bright field images of the same sections. (B-C) An image of a cross section specimen stained with the Ci-ApoBL antiserum, (D-E) a control specimen stained with a preimmune serum. Scale bar, 100  $\mu$ m. (F) Sperm homogenate was blotted onto a nitrocellulose membrane and subjected to the Far western analysis in the presence (left lane, FWB) or absence (right lane, WB) of incubation with Ci-ApoBL.

**Fig. S2. Apparent Molecular Masses of CiVC Proteins in 1D SDS-PAGE**

Total score of detected peptides derived from the protein for each gel slice is shown as a histogram. Mobility of molecular size markers is indicated on the left. Theoretical molecular mass of each protein is shown in parentheses at the top. (A) CiVC15 and CiVC66. Note that observed molecular masses of CiVC15 and CiVC66 were much higher than the predicted ones, suggesting that they are highly N-glycosylated because they have multiple putative N-glycosylation sites (VC15, four; VC66, three; see Fig. 3). (B) CiVC57. Domain architecture of the full-length product of CiVC57 is shown at the top. Regions from which detected peptides are derived are color-coded. Left histogram, peptide score. Right histogram, proportional peptide score normalized to 100% in each gel slice. Processing patterns of CiVC57, which are speculated from the profile of detected peptides from each gel slice, are shown on the right.

**Fig. S3. Detection of v-Themis Alleles by LC/MS/MS**

Schematic architectures of v-Themis alleles are shown at the top with potential N-glycosylation sites. Theoretical molecular mass of each allele is shown in parentheses at the top. N.D., not determined. Observed molecular masses of v-Themis alleles were always higher than the predicted ones and showed considerable variations among alleles.

**In SupplTables.xls**

**Table S1. Full List of Identified VC Proteins**

**Table S2. Categories Used for Functional Classification of the VC Proteins**

**Table S3. Proteins Identified in the FT Fraction**

**Table S4. VC-Enriched Proteins**

**Table S5. Proteins Identified in the AE Sample**

Note: This analysis revealed that most components of the VC in *C. intestinalis* were scarcely extracted by the acid treatment except for Ci-ApoBL. Therefore, most proteins that appear in this list are considered to be contaminants from non-VC derived materials.

Figure S1

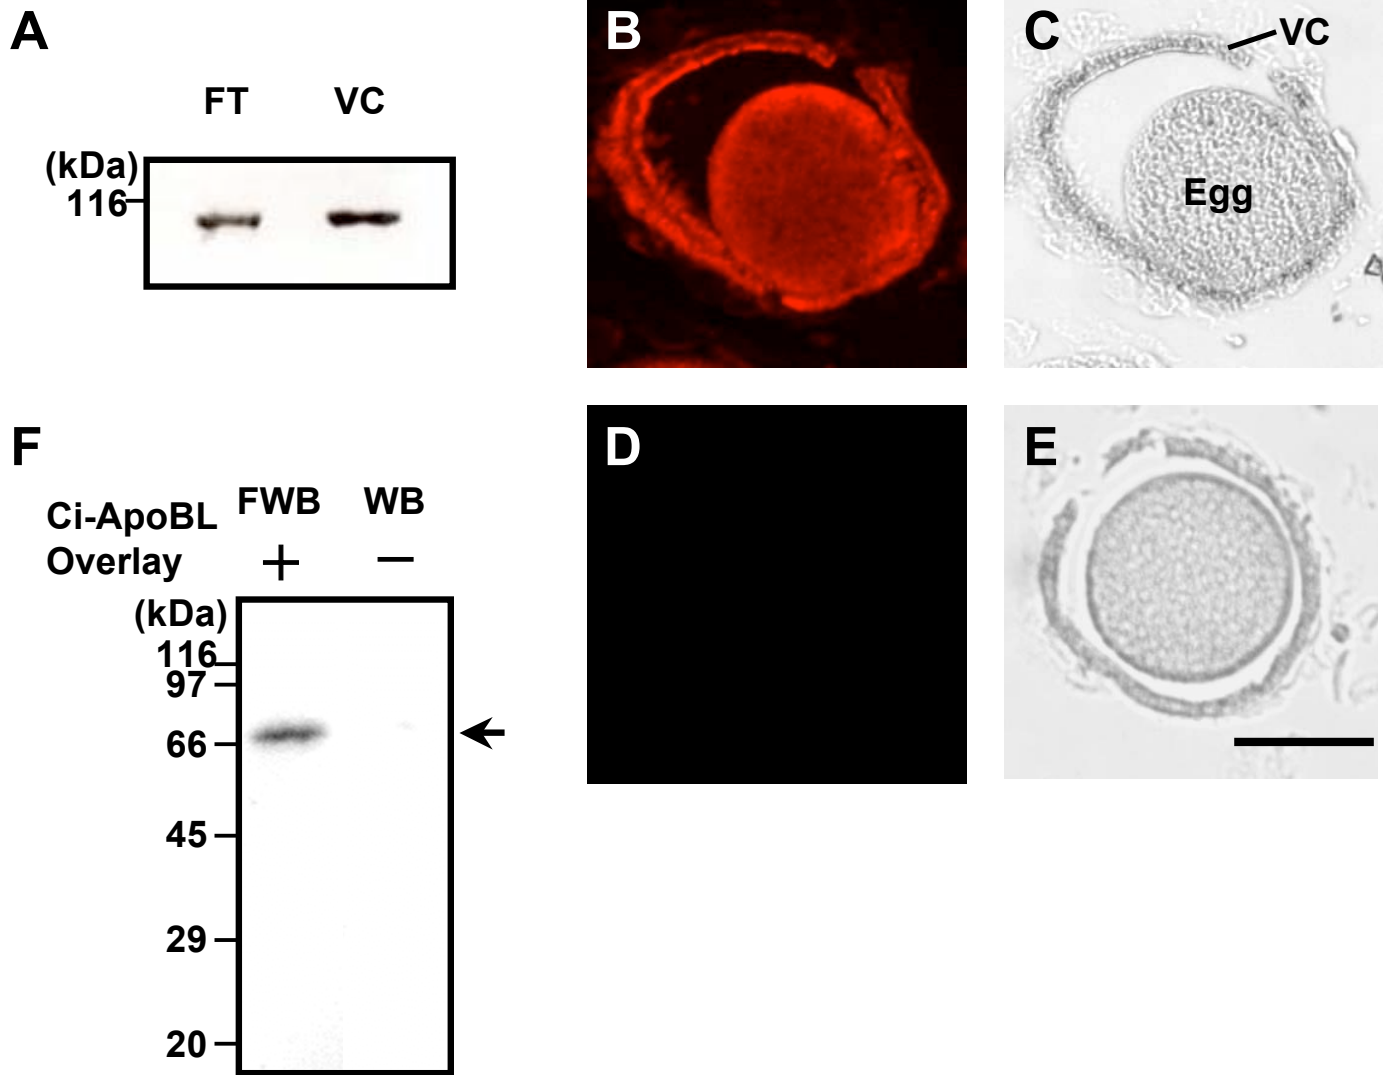

Figure S2

**A**

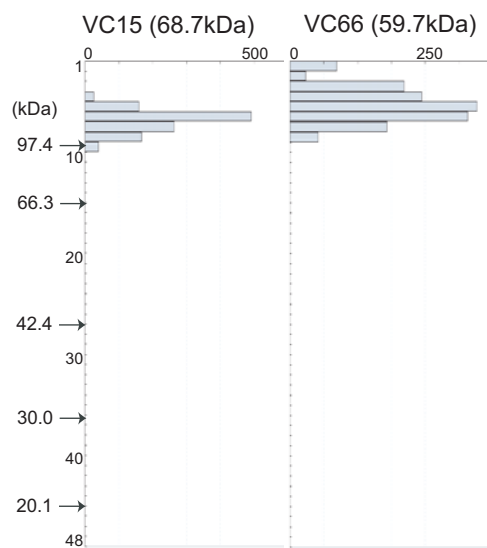

**B**

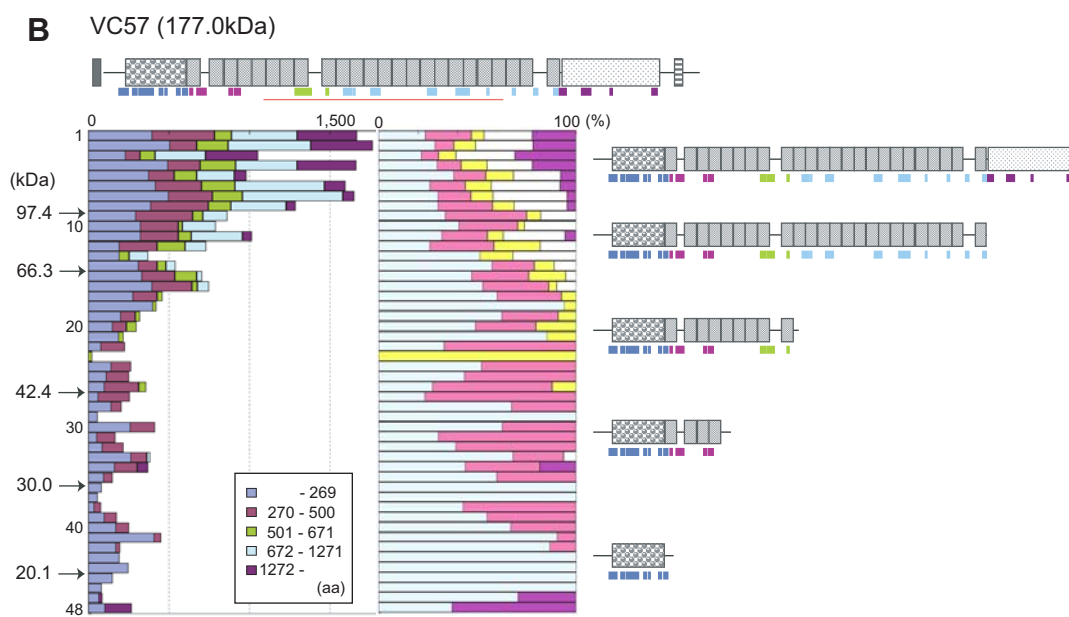

Supplement: M809672200_1.pdf [file M809672200_1.pdf]
